# Supplementary material for: Caspase-8 mutations associated with head and neck cancer differentially retain functional properties related to TRAIL-induced apoptosis and cytokine induction
Source: PubMed Central journal article supplement (PMC8346537; doi:10.1038/s41419-021-04066-z), 2021-08-06
Supplement: 41419_2021_4066_MOESM1_ESM.pdf [file 41419_2021_4066_MOESM1_ESM.pdf]

1 **Supplementary Figure Legends**

2

3 **Supplementary Fig. 1 Genetic deletion of *caspase-8* abrogates TRAIL induction**

4 **of HeLa cell death. A** Parental HeLa and HeLa-CASP8 KO cells were treated for 24  
5 hours in the absence or presence of TRAIL (200 ng/mL), followed by immunoblotting for  
6 PARP or GAPDH. Similar results were seen in three independent experiments. **B**  
7 Parental HeLa and HeLa-CASP8 KO cells were treated for 24 hours in the absence or  
8 presence of varying concentrations of TRAIL, followed by flow cytometric analysis of  
9 annexin V or propidium iodide (PI) staining.

10

11 **Supplementary Fig. 2 Generation of models in the HNSCC cell line PE/CA-PJ49.**

12 **A** PE/CA-PJ49, a HNSCC cell line, was treated for 24 or 48 hours with the indicated  
13 concentrations of TRAIL, followed by performance of MTT assays. Data were plotted  
14 as the percent of cell growth relative to no TRAIL treatment. Columns represent the  
15 means from quadruplicate wells; error bars represent the SEM. One-way ANOVA was  
16 performed for comparison of differences between multiple groups. **B** Parental PE/CA-  
17 PJ49 cells and PE/CA-PJ49-CASP8 KO cells were subjected to immunoblotting for  
18 caspase-8 or GAPDH. **C** PE/CA-PJ49-CASP8 KO cells engineered for DOX-inducible  
19 expression of FLAG-tagged, WT caspase-8 or MT caspase-8 (D303G), were treated for  
20 24 hours in the absence or presence of DOX (1  $\mu$ g/mL), followed by immunoblotting  
21 with anti-FLAG. Immunoblotting for GAPDH was used as a loading control.

22

23 **Supplementary Fig. 3 HNSCC-associated caspase-8 mutant fails to mediate**  
24 **TRAIL-induced apoptosis with similar potency to WT caspase-8 in PE/CA-PJ49**  
25 **HNSCC cells. A** PE/CA-PJ49-CASP8 KO cells engineered for DOX-inducible  
26 expression of WT caspase-8 or MT caspase-8 (D303G) were treated for 24 hours with  
27 no DOX, DOX alone, or DOX plus TRAIL, followed by flow cytometric analysis of  
28 annexin V and PI staining. **B** Cells were treated for 48 hours with DOX or DOX plus  
29 TRAIL before performance of MTT assays.

30

31 **Supplementary Fig. 4 HNSCC-associated caspase-8 mutants display differential**  
32 **capacities to mediate TRAIL induced PARP cleavage. A** HeLa-CASP8 KO cells  
33 engineered for DOX inducible expression of WT caspase-8 or the indicated caspase-8  
34 mutants were pre-treated for 2 hours with DOX, followed by treatment with DOX plus  
35 vehicle (V) or DOX plus TRAIL (T; 200 ng/mL) for an additional 6 or 24 hours.  
36 Immunoblotting was performed to detect total and cleaved PARP. Blotting for GAPDH  
37 was used as a loading control. To allow comparison of gels, an equivalent amount of  
38 lysate from cells expressing exogenous WT caspase-8 was loaded in the left lanes of  
39 each gel. **B** Densitometry was performed on the immunoblotting data in panel A to  
40 allow determination of the cleaved PARP/GAPDH ratio for each sample. Columns  
41 represent the means of triplicate densitometric values calculated by ImageJ and error  
42 bars represent SEM. The experiments were performed 3 times with similar results.

43

44 **Supplementary Fig. 5. Homodimerization of WT CASP8-FLAG/WT CASP8-HA**  
45 **compared to heterodimerization of WT CASP8-FLAG/MT(D303G) CASP8-HA. Co-**

46 immunoprecipitations were performed to detect homodimerization of WT caspase-8 and  
47 heterodimerization between MT caspase-8 proteins and WT caspase-8. **A** HeLa-  
48 CASP8 KO cells engineered for DOX-inducible expression of WT caspase-8-FLAG  
49 were treated in the absence or presence of DOX. Simultaneously, the cells were  
50 transiently transfected with constructs encoding the indicated WT caspase-8-HA or MT  
51 caspase-8-HA. Experiments were performed in the presence of 30  $\mu$ M z-VAD-FMK to  
52 minimize loss of caspase-8 proteins due to processing. Eight hours after transfection,  
53 cell lysates were prepared and subjected to immunoprecipitation with anti-FLAG,  
54 followed by immunoblotting with anti-HA to detect dimerization (for  
55 immunoprecipitations: 500  $\mu$ g of input for WT; 375  $\mu$ g for D303G). **B** Input lysates were  
56 analyzed by immunoblotting for expression of the MT caspase-8-HA and WT caspase-  
57 8-FLAG proteins. Due to varying levels of expression of the HA-tagged MT proteins,  
58 varying amounts of input lysate were loaded (50  $\mu$ g for WT; 37.5  $\mu$ g for D303G)  
59 Experiments in panels A and B were performed three times with similar results.

60

61 **Supplementary Fig. 6 Genetic deletion of caspase-8 abrogates TRAIL induction**  
62 **of cytokine mRNAs and proteins in HeLa cells.** **A** Parental HeLa cells were treated  
63 for 6, 12, or 24 hours with the indicated concentrations of TRAIL. Following treatment,  
64 RNA was harvested and subjected to qPCR for IL-8, IL-6, and CXCL1 mRNAs. Data  
65 were plotted as the fold induction relative to that observed in cells that received no  
66 TRAIL. Columns represent the means from triplicate wells; error bars represent the  
67 SEM. The experiment was performed 3 times with similar results. **B** Parental HeLa  
68 cells and HeLa-CASP8 KO cells were treated for 24 hours with vehicle or TRAIL (200

69 ng/mL). Cell supernatants were harvested and ELISA assays were performed to  
70 assess IL-8, IL-6, and CXCL1 protein levels in TRAIL treated cells relative to vehicle  
71 treated cells. Data were plotted as the fold induction relative to no TRAIL. Columns  
72 represent the means from triplicate wells; error bars represent the SEM. Similar results  
73 obtained in two independent experiments.

74

75 **Supplementary Fig. 7 The D303G caspase-8 MT mediates TRAIL induction of IL-8**

76 **protein. A** HeLa-CASP8 KO cells engineered to express DOX inducible LacZ or WT  
77 caspase-8 were pre-treated with DOX for 4 hours, followed by treatment for an  
78 additional 12 hours with DOX plus vehicle or DOX plus TRAIL (200 ng/mL). Cell  
79 supernatants were harvested and ELISA assays were used to determine levels of  
80 secreted IL-8 protein. Columns represent the means from triplicate wells; error bars  
81 represent the SEM. Student's *t* test was performed to compare groups treated with or  
82 without TRAIL. Similar results were obtained in 3 independent experiments. **B** HeLa-  
83 CASP8 KO cells engineered to express DOX inducible D303G caspase-8 were pre-  
84 treated with DOX, followed by treatment for 6 or 12 hours with DOX plus vehicle or  
85 DOX plus TRAIL in medium lacking serum. IL-8 levels in supernatants were measured  
86 by ELISA. Columns represent the means from 3 independent experiments; error bars  
87 represent the SEM. Student's *t* test was performed to compare groups treated with or  
88 without TRAIL.

89

90 **Supplementary Fig. 8 Caspase-8 is required for TRAIL induction of IL-8 protein in**

91 **PE/CA-PJ49 cells.** Cells were treated for 24 hours with vehicle or TRAIL (200 ng/mL)

92 and supernatants were collected and analyzed by ELISA for secreted IL-8 protein.  
93 Columns represent the means from triplicate wells; error bars represent the SEM.  
94 Student's *t* test was performed to compare groups treated with vehicle or TRAIL.  
95 Similar results obtained in 3 independent experiments.

96

97 **Supplementary Fig. 9. Caspase-8 mediates death ligand induction of cell death**

98 **and cytokine expression in MOC1 cells. A** Parental MOC1 cells and MOC1-CASP

99 KO cells were subjected to immunoblotting with anti-caspase-8. Immunoblotting with

100 anti-GAPDH was used as loading control. **B** MOC1 cells were treated for 48 hours in

101 the absence or presence of TRAIL (200 ng/mL), followed by performance of MTT

102 assays. **C** Parental MOC1 cells and MOC1-CASP8 KO cells were treated in the

103 absence or presence of TNF $\alpha$  (200 ng/mL), followed by MTT assays. **D** Cells were

104 treated in the absence or presence of TNF $\alpha$  (200 ng/mL), followed by RT-qPCR for IL-6

105 mRNA. **E** MOC1-CASP8 KO cells engineered for DOX-inducible expression of FLAG-

106 tagged LacZ, WT caspase-8, or the D303G caspase-8 MT, were treated in the absence

107 or presence of DOX, followed by immunoblotting with anti-FLAG or anti-GAPDH. **F**

108 MOC1-CASP8 KO cells engineered for DOX-inducible expression of LacZ or the D303G

109 caspase-8 MT were treated for 16 with DOX, followed by 12 hours of treatment with

110 DOX plus TNF $\alpha$  and RT-qPCR for IL-6 mRNA.

111

112 **Supplementary Fig. 10 DOX inducible expression of WT or MT caspase-8 in**

113 **MOC1 tumors in immunocompetent mice.** MOC1 tumors engineered for DOX

114 inducible expression of WT caspase-8 or the D303G caspase-8 mutant were grown in

115 wild-type C57BL/6 mice and treated with either DOX or no DOX. Tumors harvested at  
116 the end of treatment were subjected to immunoblotting with anti-FLAG to detect  
117 expression of the induced proteins. The tumor samples which demonstrated DOX-  
118 induced expression of WT (mouse #1, 4, 6, 7, 8) or MT caspase-8 (#9, 10, 11, 13, 14,  
119 16) were used for plotting of growth curves (Supplementary Fig. 8) or immune profiling  
120 (Fig. 7A and 8B).

121

122 **Supplementary Fig. 11 Growth curves for MOC1 tumors engineered for DOX**  
123 **inducible expression of WT caspase-8 (open symbols) or the D303G caspase-8**  
124 **mutant (closed symbols).** Treatment of tumor-bearing mice with DOX (squares), or  
125 no DOX (circles) was initiated at the indicated time point. Tumor volume was  
126 determined thrice weekly. In the DOX treatment groups, only tumors demonstrating  
127 DOX induction of the FLAG-tagged WT or MT caspase-8 (Supplementary Fig. 7) were  
128 plotted.
